# Supplementary material for: Sodium-ion storage properties of nickel sulfide hollow nanospheres/reduced graphene oxide composite powders prepared by a spray drying process and the nanoscale Kirkendall effect
Source: Royal Society of Chemistry journal article supplement (doi:10.1039/c5nr04252f), 2015-01-01
Supplement: c5nr04252f1.pdf [file c5nr04252f1.pdf]

## **Supporting Information**

### **Sodium-ion storage properties of nickel sulfide hollow nanospheres/reduced graphene oxide composite powders prepared by spray drying process and nanoscale Kirkendall effect**

Gi Dae Park, Jung Sang Cho, and Yun Chan Kang\*

Department of Materials Science and Engineering, Korea University, Anam-dong, Seongbuk-  
gu, Seoul 136-713, Republic of Korea

E-mail: [yckang@korea.ac.kr](mailto:yckang@korea.ac.kr) Fax: +82-2-928-3584; Tel: +82-2-3290-3268

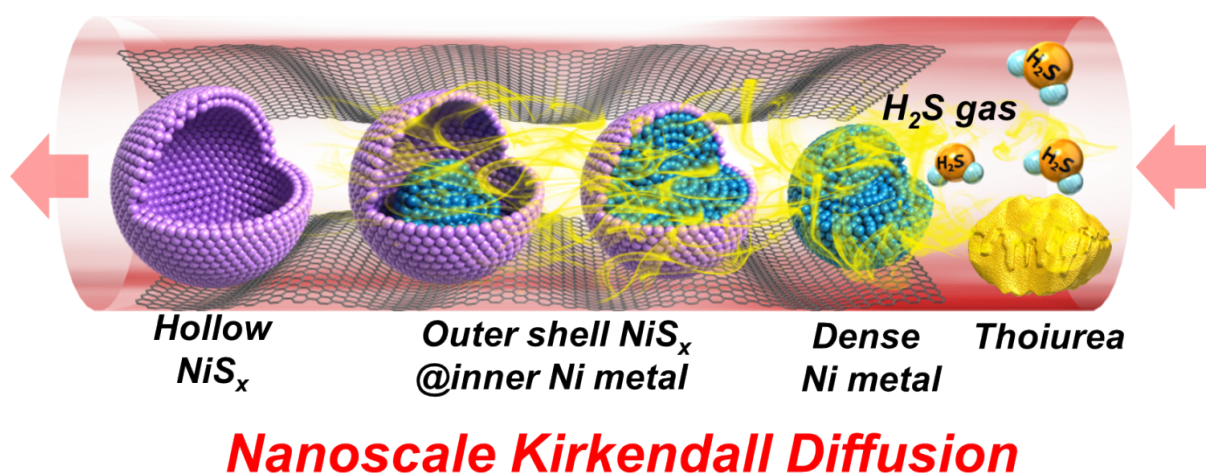

**Figure S1.** Formation mechanism of the nickel sulfide hollow nanospheres-rGO composite powder by nanoscale Kirkendall diffusion.

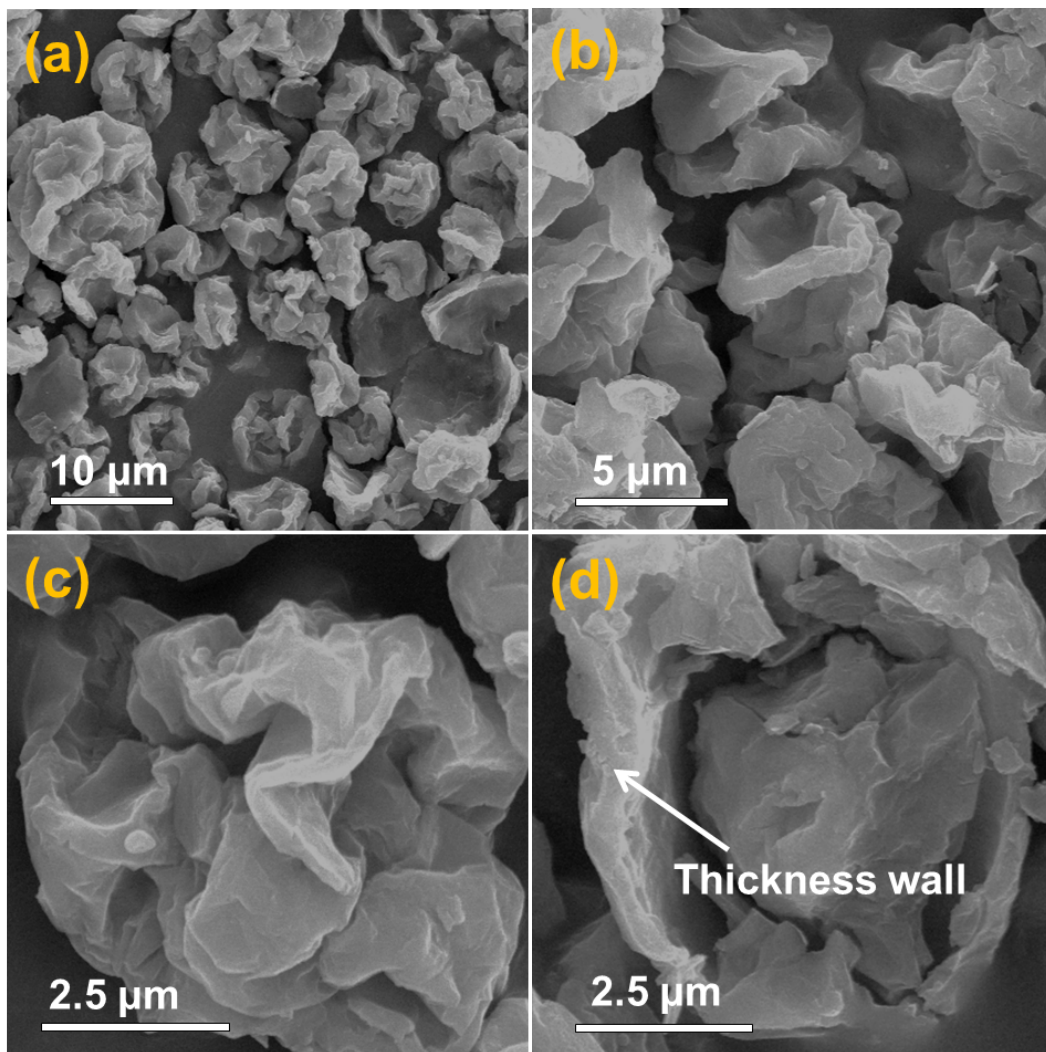

**Figure S2.** Morphologies of the nickel acetate/GO precursor powders prepared directly by spray drying process.

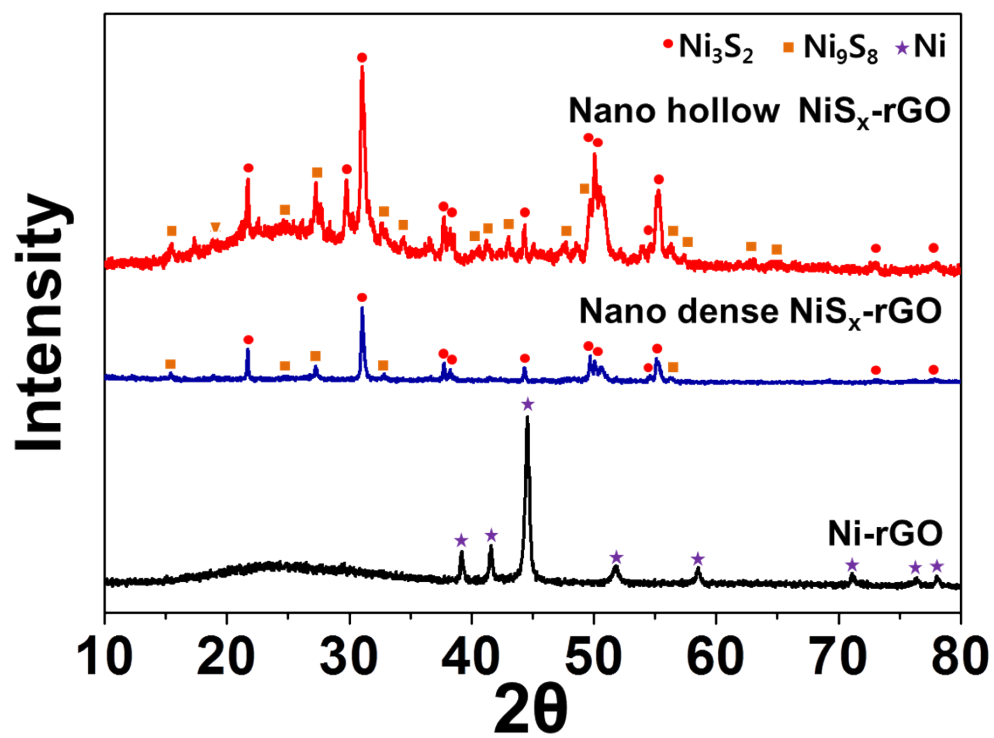

**Figure S3.** XRD patterns of the nickel sulfide hollow and dense nanospheres/rGO composite powders and nickel nanopowders/rGO composite powders.

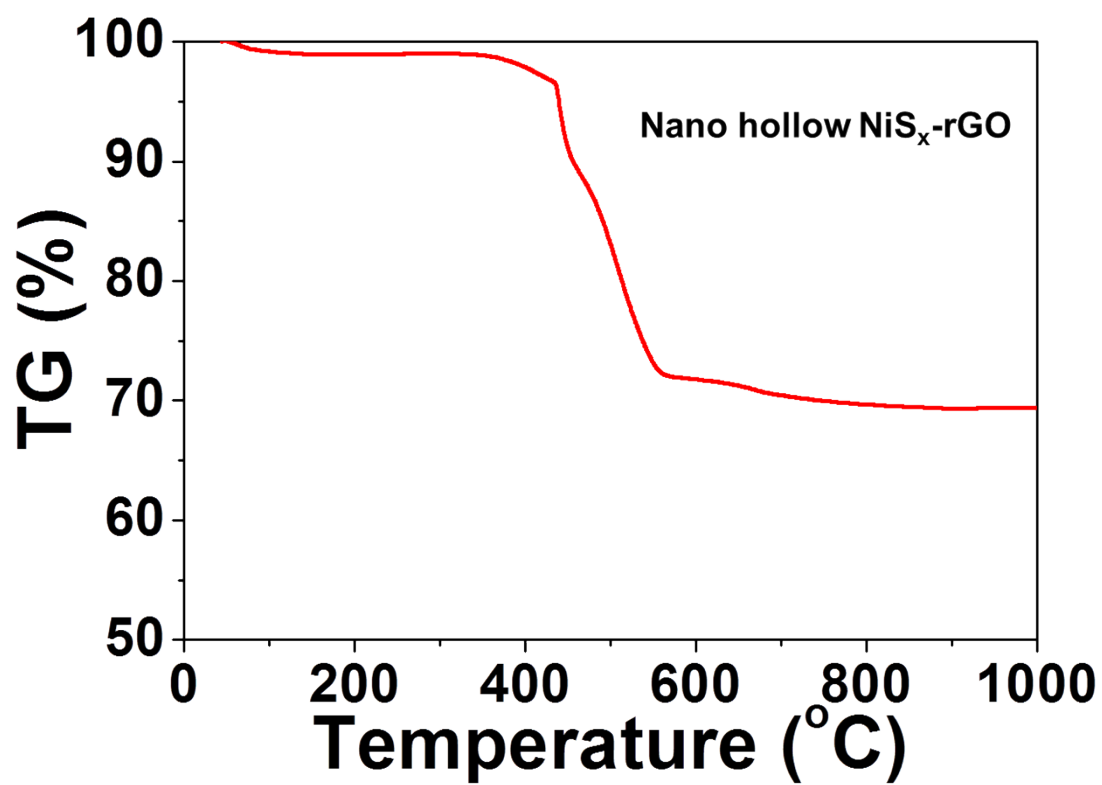

Figure S4. TG curve of the nickel sulfide hollow nanospheres/rGO composite powders.

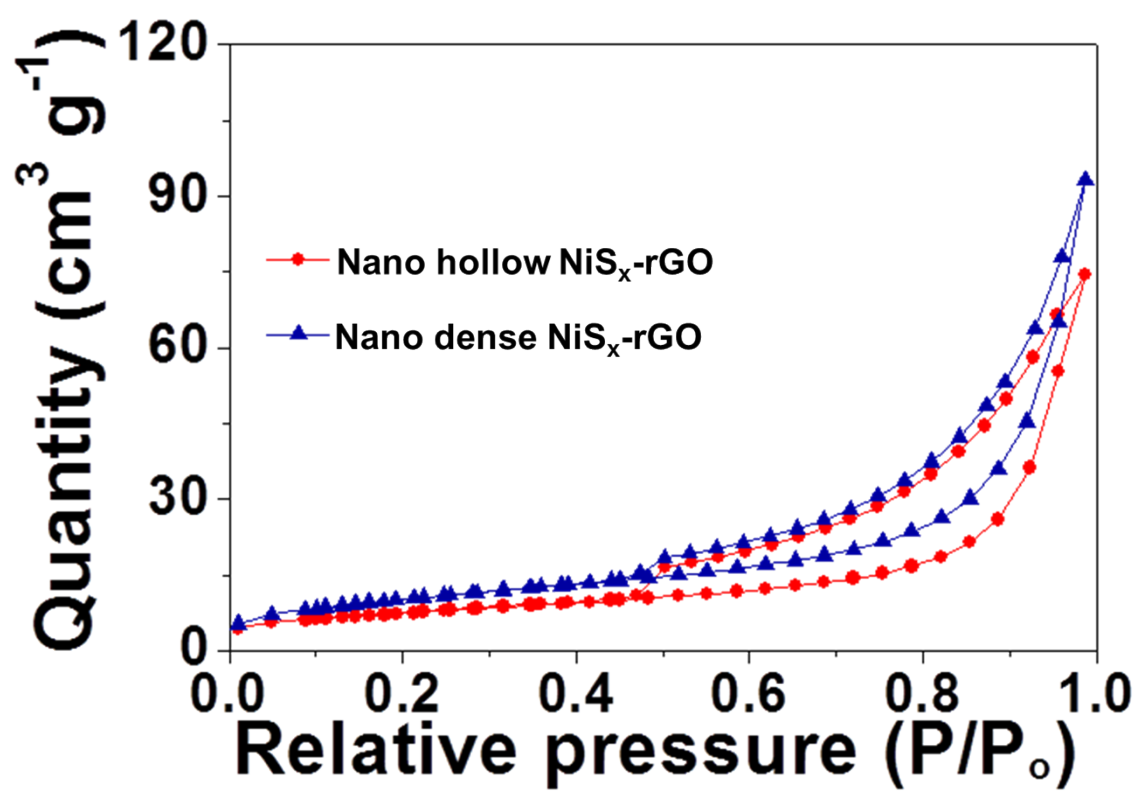

**Figure S5.** N<sub>2</sub> adsorption and desorption isotherms of the nickel sulfide hollow and dense nanospheres/rGO composite powders.
